# Supplementary material for: Repurposing Dihydropyridines for Treatment of Helicobacter pylori Infection
Source: PubMed Central journal article supplement (PMC6969910; doi:10.3390/pharmaceutics11120681), 2019-12-15
Supplement: pharmaceutics-11-00681-s001.pdf [file pharmaceutics-11-00681-s001.pdf]

# Supplementary Materials: Repurposing Dihydropyridines for Treatment of *Helicobacter pylori* Infection

Andrés González, Javier Casado, Eduardo Chueca, Sandra Salillas, Adrián Velázquez-Campoy, Vladimir Espinosa Angarica, Lucie Bénéjat, Jérôme Guignard, Alban Giese, Javier Sancho, Philippe Lehours and Angel Lanas

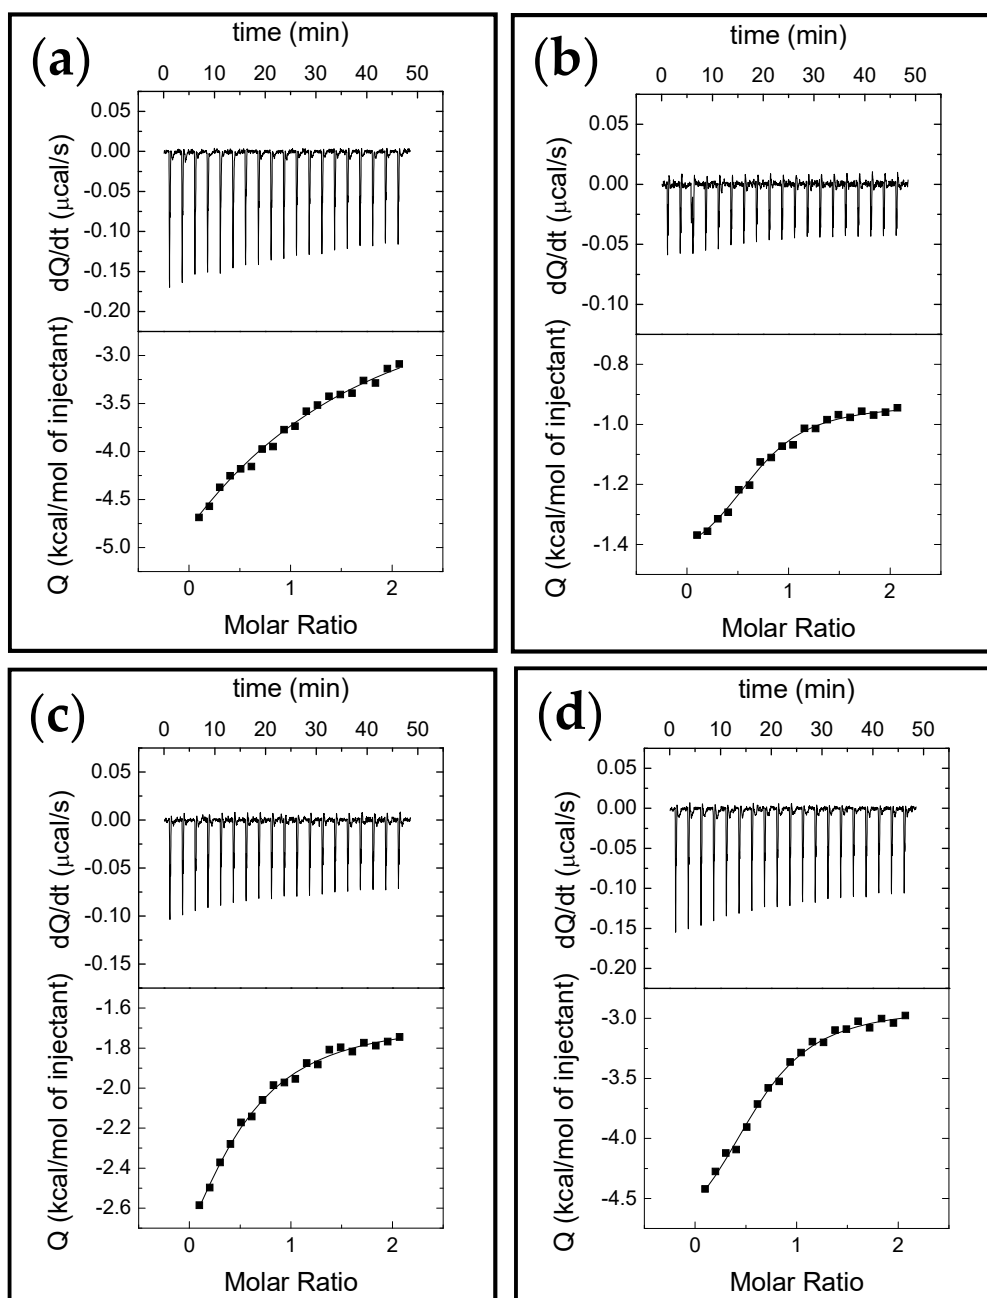

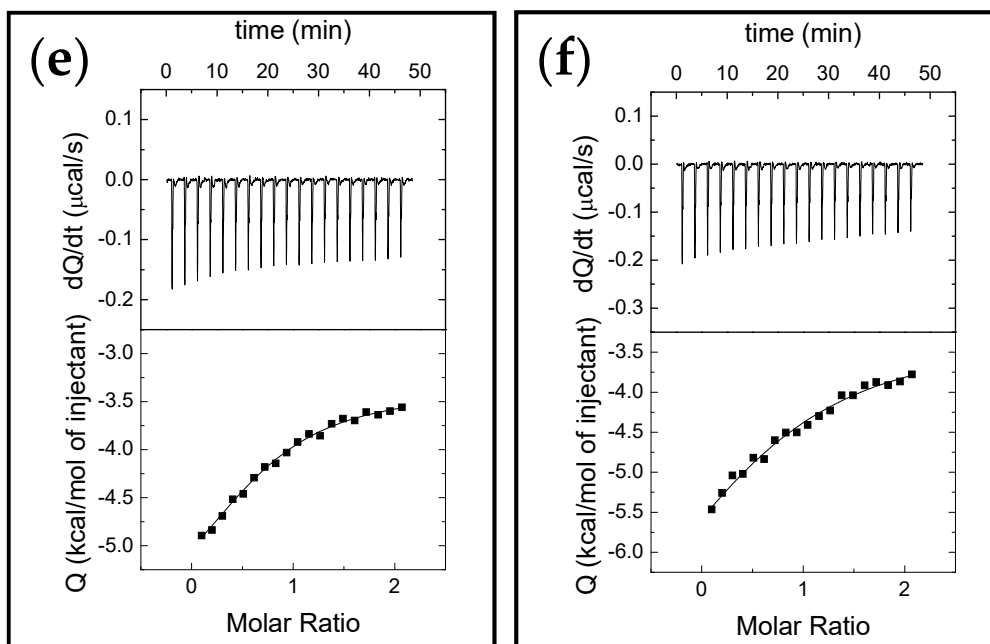

**Figure S1.** Isothermal titration calorimetry experiments for the interaction of *H. pylori* HsrA response regulator with its DHP-class inhibitors Nifedipine (a), Nicardipine (b), Nisoldipine (c), Nimodipine (d), Nitrendipine (e), and Lercanidipine (f). In the figure, upper panels show the ITC thermograms while lower panels show the binding isotherms.
